# Supplementary material for: A synthetic approach towards micron-sized smectic liquid crystal capsules via the diffusion controlled swelling method
Source: Royal Society of Chemistry journal article supplement (doi:10.1039/c4py01767f), 2015-01-01
Supplement: c4py01767f1.pdf [file c4py01767f1.pdf]

## Electronic Supplementary Information for

# A synthetic approach towards micron-sized smectic liquid crystal capsules *via* the diffusion controlled swelling method

Yingfeng Tu,<sup>a,b\*</sup> Yan Gu,<sup>a</sup> Ryan M. Van Horn,<sup>b</sup> Maxim Mitrokhin,<sup>c</sup> Frank W. Harris<sup>b\*</sup> and Stephen Z. D.

Cheng<sup>b</sup>

<sup>a</sup> Suzhou Key Laboratory of Macromolecular Design and Precision Synthesis, Jiangsu Key Laboratory of Advanced Functional Polymer Design and Application, College of Chemistry, Chemical Engineering and Materials Science, Soochow University, Suzhou 215123, P. R. China.

<sup>b</sup> Maurice Morton Institute and Department of Polymer Science, The University of Akron, Akron, OH, 44325.

<sup>c</sup> Hollenderasen 28, 3234, Sandefjord, Norway.

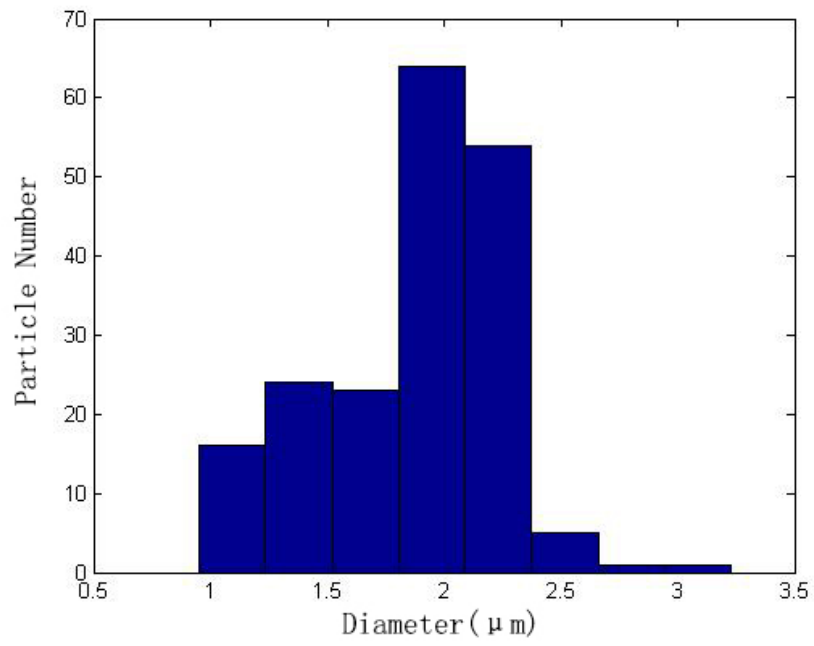

**Fig. S1.** The histogram of particle size distribution for Fig. 1a.

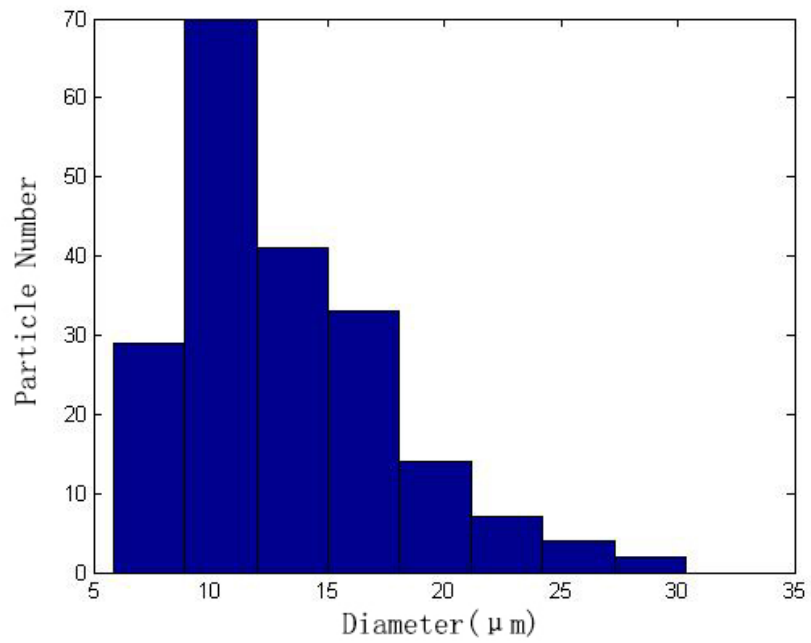

**Fig. S2.** The histogram of particle size distribution for Fig. 1b.

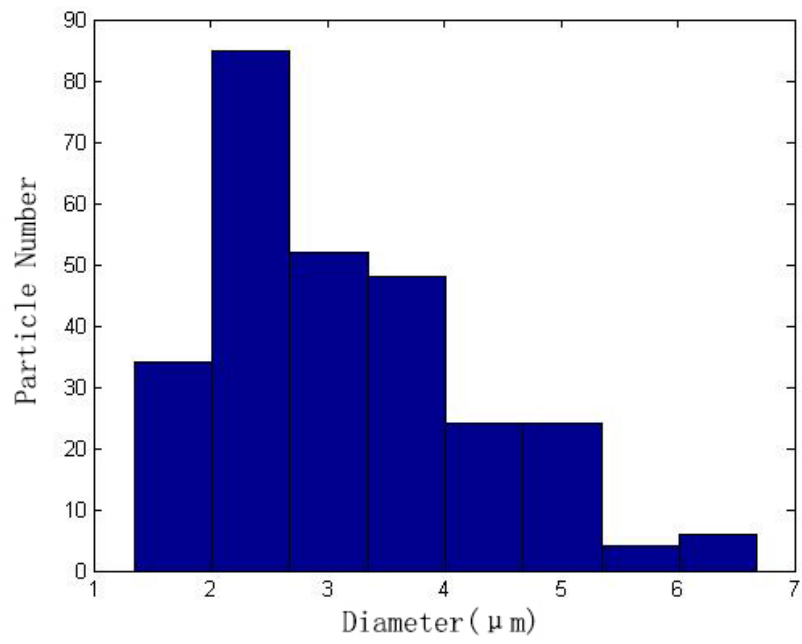

**Fig. S3.** The histogram of particle size distribution for Fig. 1c.

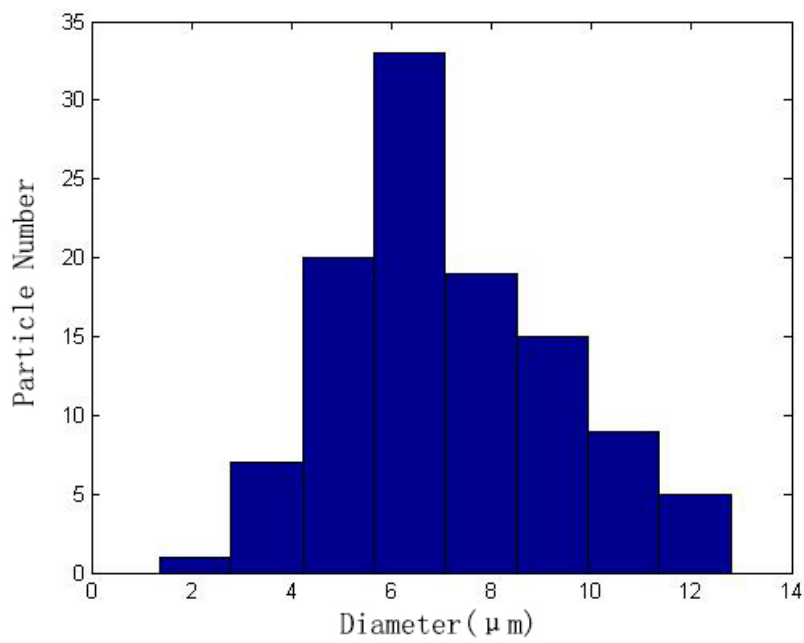

**Fig. S4.** The histogram of particle size distribution for Fig. 1d.

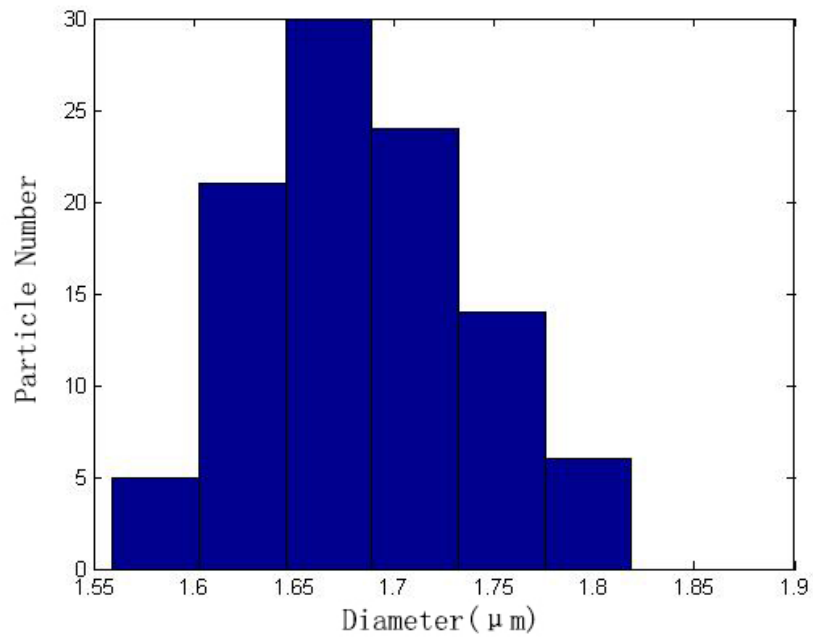

**Fig. S5.** The histogram of particle size distribution for Fig. 3a.

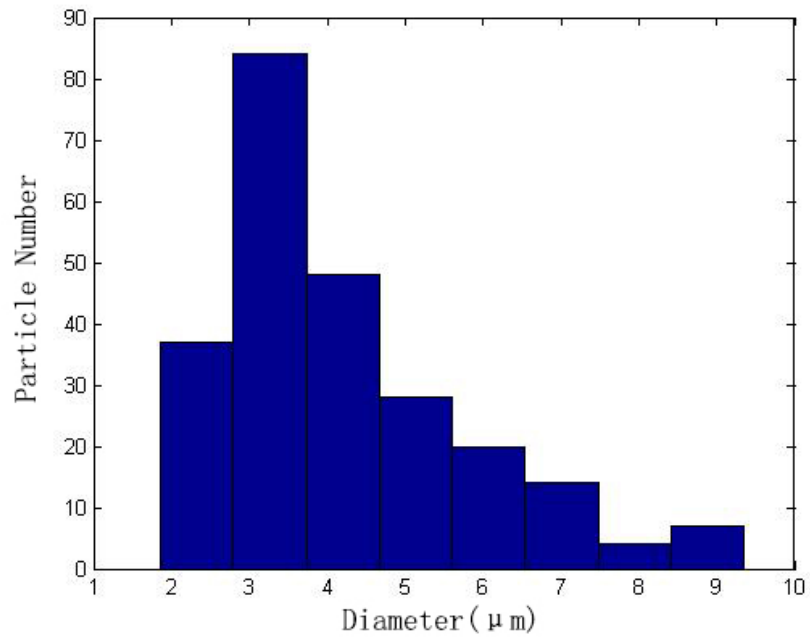

**Fig. S6.** The histogram of particle size distribution for Fig. 3b.

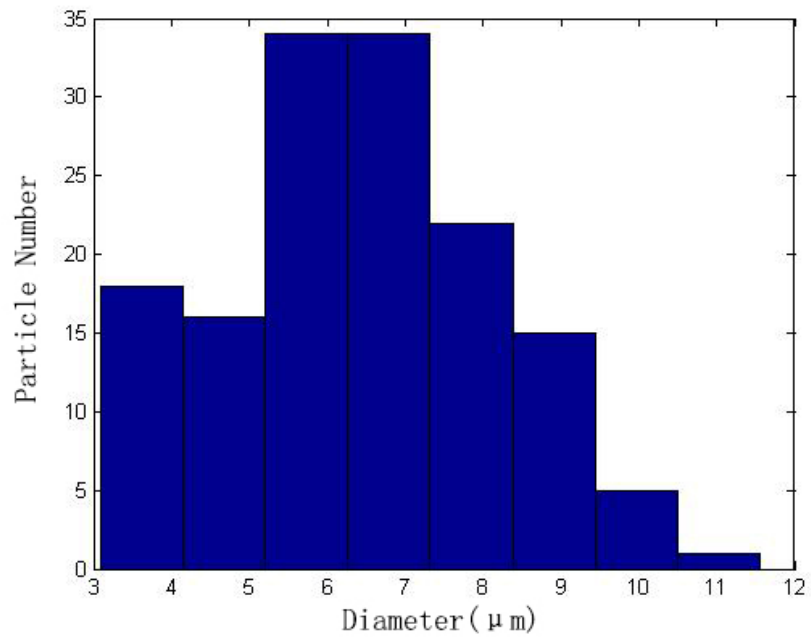

**Fig. S7.** The histogram of particle size distribution for Fig. 4a.

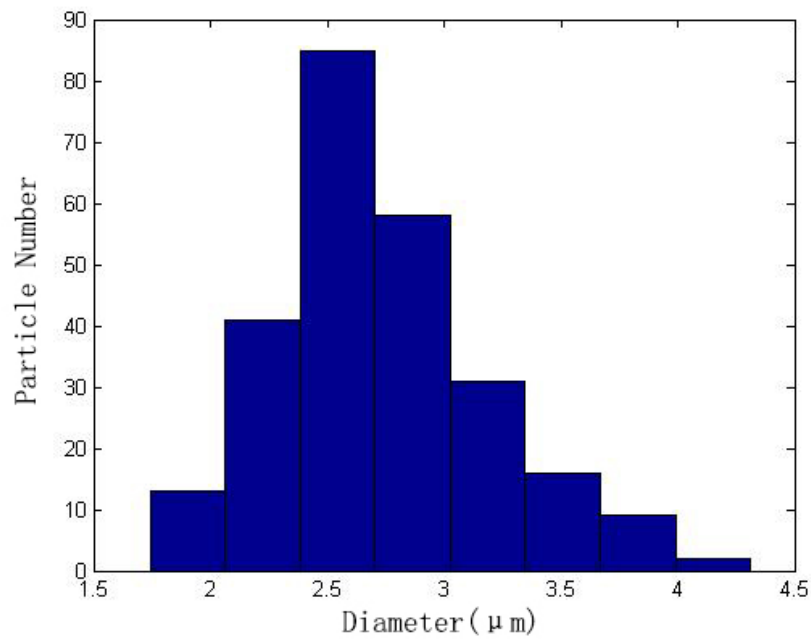

**Fig. S8.** The histogram of particle size distribution for Fig. 4b.
